# Supplementary material for: MRI-based prediction of microvascular invasion/high tumor grade and adjuvant therapy benefit for solitary HCC ≤ 5 cm: a multicenter cohort study
Source: Springer Nature journal article supplement (doi:10.1007/s00330-024-11295-1), 2024-12-19
Supplement: MOESM1 [file 330_2024_11295_MOESM1_ESM.pdf]

## Supplemental Material 1: Imaging acquisition details

### Training dataset

For the training dataset, all contrast-enhanced MR images were acquired on one of the following eight types of 3.0 T or 1.5 T MR systems (Siemens MAGNETOM Skyra 3.0 T; Siemens TrioTim 3.0 T; Siemens Avanto 1.5 T; GE SIGNA™ Architect 3.0 T; GE SIGNA™ Premier 3.0 T; GE Discovery MR 750 3.0 T; Philips Ingenia Elition X 3.0 T; uMR588 1.5 T) using either extracellular contrast-enhanced MRI (ECA-MRI) or gadoxetate disodium-enhanced MRI (EOB-MRI). For the acquisition of ECA-MRI, 0.1 mmol/kg of gadopentetate dimeglumine (Magnevist®; Bayer Schering Pharma AG), gadoterate meglumine (Dotarem®; Guerbet), or gadobenate dimeglumine (MultiHance®; Bracco) was injected at a rate of 2.5 ml/s. For the acquisition of EOB-MRI, 0.025 mmol/kg of EOB (Primovist®; Bayer Schering Pharma AG or XianAi®; Chia Tai TianQing Pharmaceutical Co., Ltd) was injected at a rate of 1.0-2.0 ml/s.

All patients were asked to fast for 6-8 hours before MR examinations. The MRI sequences included: **(a)** T2-weighted imaging; **(b)** diffusion-weighted imaging (b values: 0, 50, 500, 800, 1000, and 1200 s/mm<sup>2</sup> [Siemens MAGNETOM Skyra]; 0, 50, 800 s/mm<sup>2</sup> [Siemens TrioTim; Siemens Avanto]; 0, 50, 1000 s/mm<sup>2</sup> [Siemens Avanto; GE SIGNA™ Architect; GE SIGNA™ Premier; uMR588]; 0, 200, 800, and 1000 s/mm<sup>2</sup> [GE Discovery MR 750]; 0, 200, 1000 s/mm<sup>2</sup> [Philips Ingenia Elition X]) with apparent diffusion coefficient maps reconstructed using the monoexponential model; **(c)** in- and out-of-phase T1-weighted imaging; and **(d)** dynamic T1-weighted imaging in the pre-contrast phase, late arterial phase, portal venous phase (60 s after the start of contrast media injection), delayed phase (for ECA-MRI, 3min after start of contrast media injection) or transitional phase (for EOB-MRI, 5min after the start of contrast media injection), and hepatobiliary phase (for EOB-MRI, 20min after the start of contrast media injection). The arterial phase images were acquired with either a bolus-tracking method (acquisition triggered 7s after the arrival of the contrast bolus in the celiac trunk) or a multiple arterial phase imaging technique (acquired with an 18 s-breath-hold 20s after the start of contrast media injection and further reconstructed with a temporal resolution of 3 s).

## Testing dataset

For the testing dataset, seven types of MRI scanners (GE Signa HDxt 1.5 T, GE Discovery MR 750w 3.0 T, Philips Achieva 3.0 T, Philips Ingenia 3.0 T, Siemens Verio 3.0 T, Siemens MAGNETOM Vida 3.0 T, uMR780 3.0 T) were used for the acquisition of contrast-enhanced MR images. Both ECA and EOB were used. For the acquisition of ECA-MRI, 0.1 mmol/kg of gadopentetate dimeglumine (Magnevist®; Bayer Schering Pharma AG or SCHERING) or gadoteric acid meglumine (JiaDiXian®; HENGRUI) was injected at a rate of 2.5 ml/s. For the acquisition of EOB-MRI, 0.025 mmol/kg of EOB (Primovist®; Bayer Schering Pharma AG or XianAi®; Chia Tai TianQing Pharmaceutical Co., Ltd) was injected at a rate of 1.0-2.0 ml/s.

The MRI sequences included (**a**) T2-weighted imaging; (**b**) diffusion-weighted imaging (b values: 0, and 600s/mm<sup>2</sup> [GE Signa HDxt 1.5 T, Siemens Verio 3.0 T]; 0, and 800 s/mm<sup>2</sup> [Philips Achieva 3.0 T, Philips Ingenia 3.0 T]; 0, and 1000 s/mm<sup>2</sup> [GE Discovery MR 750w 3.0 T]; 0, 50, and 800s/mm<sup>2</sup> [Siemens MAGNETOM Vida 3.0 T]; 0, 50, and 1000s/mm<sup>2</sup> [uMR 780 3.0 T] with apparent diffusion coefficient maps reconstructed using the monoexponential model; (**c**) in- and out-of-phase T1-weighted imaging; and (**d**) dynamic T1-weighted imaging in the pre-contrast phase, late arterial phase, portal venous phase (60s after the start of contrast media injection), delayed phase (for ECA-MRI, 3min after start of contrast media injection) or transitional phase (for EOB-MRI, 5min after the start of contrast media injection), and hepatobiliary phase (for EOB-MRI, 20min after the start of contrast media injection).

Detailed acquisition parameters for the training and testing centers are summarized in **Supplemental Table 1**.

**Supplemental Table 1. MR sequences and parameters.**

| Sequence                                                                           | Fat suppression | TR (ms) | TE (ms)  | Flip angle (°) | ST (mm) | Spacing (mm) | Matrix size | FOV (mm <sup>2</sup> ) | Acquisition Time (s) |
|------------------------------------------------------------------------------------|-----------------|---------|----------|----------------|---------|--------------|-------------|------------------------|----------------------|
| <b>Training dataset: Siemens MAGNETOM Skyra 3.0 T (18-channel body array coil)</b> |                 |         |          |                |         |              |             |                        |                      |
| T2-weighted 2D FSE                                                                 | Yes             | 2160    | 100      | 160            | 6       | 1.8          | 320×288     | 433×433                | 36                   |
| Diffusion-weighted imaging*                                                        | Yes             | 5600    | 68       | 90             | 6       | 1.8          | 100×76      | 380×289                | 233                  |
| In- and out-of-phase T1-weighted imaging                                           | No              | 81      | 2.72/1.4 | 70             | 6       | 1.8          | 352×286     | 400×325                | 24                   |
| Dynamic T1-weighted 3D GRE                                                         | Yes             | 3.95    | 1.92     | 9              | 2.5     | -            | 352×256     | 400×296                | 14                   |
| <b>Training dataset: Siemens TrioTim 3.0 T (8-channel body anterior coil)</b>      |                 |         |          |                |         |              |             |                        |                      |
| T2-weighted 2D FSE                                                                 | Yes             | 2700    | 95       | 140            | 6       | 7.8          | 320×147     | 442×254                | Respiratory gating   |
| Diffusion-weighted imaging*                                                        | Yes             | 5900    | 76       | 90             | 6       | 7.8          | 192×154     | 393×393                | 245                  |
| In- and out-of-phase T1-weighted imaging                                           | No              | 181     | 2.2/3.67 | 65             | 6       | 7.8          | 256×131     | 410×269                | 18                   |
| Dynamic T1-weighted 3D GRE                                                         | Yes             | 3.47    | 1.25     | 9              | 2.4     | -            | 320×133     | 434×257                | 17                   |

Note. —TR = repetition time; TE = echo time; ST = section thickness; FOV = field of view; 2D = two-dimensional; 3D = three-dimensional; FSE = fast spin-echo; GRE = gradient recall echo. \* Images were acquired under free breath.

| Sequence                                                                                                                                                                                                                            | Fat suppression | TR (ms) | TE (ms)   | Flip angle (°) | ST (mm) | Spacing (mm) | Matrix size | FOV (mm <sup>2</sup> ) | Acquisition Time (s) |
|-------------------------------------------------------------------------------------------------------------------------------------------------------------------------------------------------------------------------------------|-----------------|---------|-----------|----------------|---------|--------------|-------------|------------------------|----------------------|
| <b>Training dataset: Siemens Avanto 1.5 T (30-channel body anterior coil)</b>                                                                                                                                                       |                 |         |           |                |         |              |             |                        |                      |
| T2-weighted 2D FSE                                                                                                                                                                                                                  | Yes             | 2530    | 84        | 150            | 6       | 7.8          | 256×187     | 293×251                | 47                   |
| Diffusion-weighted imaging*                                                                                                                                                                                                         | Yes             | 3600    | 88        | 90             | 6       | 7.8          | 192×115     | 310×232                | 92                   |
| In- and out-of-phase T1-weighted imaging                                                                                                                                                                                            | No              | 72      | 4.92/2.22 | 70             | 6       | 7.8          | 256×158     | 328×225                | 16                   |
| Dynamic T1-weighted 3D GRE                                                                                                                                                                                                          | Yes             | 5.41    | 2.39      | 10             | 2.5     | -            | 320×138     | 382×238                | 15                   |
| <b>Training dataset: Siemens Avanto 1.5 T (8-channel body anterior coil)</b>                                                                                                                                                        |                 |         |           |                |         |              |             |                        |                      |
| T2-weighted 2D FSE                                                                                                                                                                                                                  | Yes             | 2710    | 84        | 150            | 7.5     | 9.75         | 256×177     | 308×380                | 27                   |
| Diffusion-weighted imaging*                                                                                                                                                                                                         | Yes             | 2000    | 72        | 90             | 7.5     | 9.75         | 192×125     | 308×379                | 20                   |
| In- and out-of-phase T1-weighted imaging                                                                                                                                                                                            | No              | 87      | 4.92/2.22 | 70             | 7.5     | 9.75         | 256×187     | 308×380                | 33                   |
| Dynamic T1-weighted 3D GRE                                                                                                                                                                                                          | Yes             | 5.4     | 2.38      | 10             | 2       | -            | 320×131     | 241×407                | 15                   |
| Note. —TR = repetition time; TE = echo time; ST = section thickness; FOV = field of view; 2D = two-dimensional; 3D = three-dimensional; FSE = fast spin-echo; GRE = gradient recall echo. * Images were acquired under free breath. |                 |         |           |                |         |              |             |                        |                      |

| Sequence                                                                                                                                                                                                                            | Fat suppression | TR (ms) | TE (ms) | Flip angle (°) | ST (mm) | Spacing (mm) | Matrix size | FOV (mm <sup>2</sup> ) | Acquisition Time (s) |
|-------------------------------------------------------------------------------------------------------------------------------------------------------------------------------------------------------------------------------------|-----------------|---------|---------|----------------|---------|--------------|-------------|------------------------|----------------------|
| <b>Training dataset: GE SIGNA™ Architect 3.0 T (30-channel body anterior coil)</b>                                                                                                                                                  |                 |         |         |                |         |              |             |                        |                      |
| T2-weighted 2D FSE                                                                                                                                                                                                                  | Yes             | 2400    | 85      | 111            | 7       | 2            | 320×192     | 380×304                | 34                   |
| Diffusion-weighted imaging*                                                                                                                                                                                                         | Yes             | 5000    | Minimum | 90             | 7       | 2            | 160×128     | 380×342                | Respiratory gating   |
| In- and out-of-phase T1-weighted imaging                                                                                                                                                                                            | No              | 233.8   | 2.3/1.1 | 55             | 7       | 2            | 160×288     | 380×323                | 18                   |
| Dynamic T1-weighted 3D GRE                                                                                                                                                                                                          | Yes             | 3.9     | 1.7     | 15             | 3       | -            | 320×240     | 380×380                | 15                   |
| <b>Training dataset: GE SIGNA™ Premier 3.0 T (30-channel body anterior coil)</b>                                                                                                                                                    |                 |         |         |                |         |              |             |                        |                      |
| T2-weighted 2D FSE                                                                                                                                                                                                                  | Yes             | 2200    | 85      | 111            | 7       | 2            | 320×224     | 304×380                | 47                   |
| Diffusion-weighted imaging*                                                                                                                                                                                                         | Yes             | 5000    | Minimum | 90             | 7       | 2            | 120 × 240   | 380× 380               | Respiratory gating   |
| In- and out-of-phase T1-weighted imaging                                                                                                                                                                                            | No              | 146.8   | 2.3/1.1 | 55             | 7       | 2            | 320×192     | 342×380                | 16                   |
| Dynamic T1-weighted 3D GRE                                                                                                                                                                                                          | Yes             | 3.2     | 1.4     | 15             | 2.4     | -            | 320×240     | 380× 380               | 15                   |
| Note. —TR = repetition time; TE = echo time; ST = section thickness; FOV = field of view; 2D = two-dimensional; 3D = three-dimensional; FSE = fast spin-echo; GRE = gradient recall echo. * Images were acquired under free breath. |                 |         |         |                |         |              |             |                        |                      |

| Sequence                                                                                                                                                                                                                            | Fat suppression | TR (ms) | TE (ms)   | Flip angle (°) | ST (mm) | Spacing (mm) | Matrix size | FOV (mm <sup>2</sup> ) | Acquisition Time (s) |
|-------------------------------------------------------------------------------------------------------------------------------------------------------------------------------------------------------------------------------------|-----------------|---------|-----------|----------------|---------|--------------|-------------|------------------------|----------------------|
| <b>Training dataset: GE Discovery MR 750 3.0 T (16-channel phased-array torso coil)</b>                                                                                                                                             |                 |         |           |                |         |              |             |                        |                      |
| T2-weighted 2D FSE                                                                                                                                                                                                                  | Yes             | 6315    | 78        | 111            | 6       | 2            | 288x244     | 360x280                | Respiratory gating   |
| Diffusion-weighted imaging*                                                                                                                                                                                                         | Yes             | 9230    | Minimum   | 90             | 6       | 2            | 128 x 128   | 360x 380               | Respiratory gating   |
| In- and out-of-phase T1-weighted imaging                                                                                                                                                                                            | No              | 150     | 2.5/1.3   | 70             | 6       | 2            | 288x192     | 420x420                | 31                   |
| Dynamic T1-weighted 3D GRE                                                                                                                                                                                                          | Yes             | 4.1     | 1.9       | 15             | 2       | -            | 512x512     | 380x 300               | 15                   |
| <b>Training dataset: Philips Ingenia Elition X 3.0 T (16-channel body anterior coil)</b>                                                                                                                                            |                 |         |           |                |         |              |             |                        |                      |
| T2-weighted 2D FSE                                                                                                                                                                                                                  | Yes             | 1883.51 | 90        | 90             | 6.8     | 8.5          | 272x78      | 239x69                 | 46                   |
| Diffusion-weighted imaging*                                                                                                                                                                                                         | Yes             | 1653.65 | 60.29     | 90             | 7       | 8.5          | 142x140     | 141x139                | 52                   |
| In- and out-of-phase T1-weighted imaging                                                                                                                                                                                            | No              | 164.53  | 2.30/1.15 | 50             | 6       | 7.5          | 256x201     | 206x162                | 11                   |
| Dynamic T1-weighted 3D GRE                                                                                                                                                                                                          | Yes             | 4.20    | 0.00      | 10             | 3       | 1.5          | 344x252     | 303x222                | 13                   |
| Note. —TR = repetition time; TE = echo time; ST = section thickness; FOV = field of view; 2D = two-dimensional; 3D = three-dimensional; FSE = fast spin-echo; GRE = gradient recall echo. * Images were acquired under free breath. |                 |         |           |                |         |              |             |                        |                      |

| Sequence                                                                                                                                                                                                                            | Fat suppression | TR (ms) | TE (ms)   | Flip angle (°) | ST (mm) | Spacing (mm) | Matrix size | FOV (mm <sup>2</sup> ) | Acquisition Time (s) |
|-------------------------------------------------------------------------------------------------------------------------------------------------------------------------------------------------------------------------------------|-----------------|---------|-----------|----------------|---------|--------------|-------------|------------------------|----------------------|
| Training dataset: uMR588 1.5 T (6-channel body anterior coil)                                                                                                                                                                       |                 |         |           |                |         |              |             |                        |                      |
| T2-weighted 2D FSE                                                                                                                                                                                                                  | Yes             | 2600    | 99.2      | 90             | 6.5     | 1.5          | 256×168     | 427×320                | 39                   |
| Diffusion-weighted imaging*                                                                                                                                                                                                         | Yes             | 3350    | 77        | 90             | 6.5     | 10           | 128×92      | 320×400                | Respiratory gating   |
| In- and out-of-phase T1-weighted imaging                                                                                                                                                                                            | No              | 117.6   | 4.69/2.26 | 60             | 6.5     | 1.3          | 256×174     | 320×400                | 29                   |
| Dynamic T1-weighted 3D GRE                                                                                                                                                                                                          | Yes             | 4.2     | 1.88      | 10             | 2.5     | -            | 256×154     | 255×400                | 13                   |
| Note. —TR = repetition time; TE = echo time; ST = section thickness; FOV = field of view; 2D = two-dimensional; 3D = three-dimensional; FSE = fast spin-echo; GRE = gradient recall echo. * Images were acquired under free breath. |                 |         |           |                |         |              |             |                        |                      |

| Sequence                                                                                                                                                                                                                            | Fat suppression | TR (ms) | TE (ms) | Flip angle (°) | ST (mm) | Spacing (mm) | Matrix size | FOV (mm <sup>2</sup> ) | Acquisition Time (s) |
|-------------------------------------------------------------------------------------------------------------------------------------------------------------------------------------------------------------------------------------|-----------------|---------|---------|----------------|---------|--------------|-------------|------------------------|----------------------|
| <b>Testing dataset: GE Signa HDxt 1.5 T (8-channel body upper coil)</b>                                                                                                                                                             |                 |         |         |                |         |              |             |                        |                      |
| T2-weighted 2D FSE                                                                                                                                                                                                                  | Yes             | 6666.7  | 86      | 90             | 6       | 7            | 288×224     | 390×390                | 192                  |
| Diffusion-weighted imaging*                                                                                                                                                                                                         | Yes             | 6000.0  | 68.5    | 90             | 6       | 7            | 128×128     | 390×390                | 98                   |
| In- and out-of-phase T1-weighted imaging                                                                                                                                                                                            | No              | 180     | 4.7/2.2 | 90             | 6       | 7            | 288×160     | 390×390                | 22                   |
| Dynamic T1-weighted 3D GRE                                                                                                                                                                                                          | Yes             | 3.9     | 1.8     | 15             | 5.4     | 2.7          | 288×200     | 390×390                | 15                   |
| <b>Testing dataset: GE Discovery MR 750w 3.0 T (36-channel body anterior coil)</b>                                                                                                                                                  |                 |         |         |                |         |              |             |                        |                      |
| T2-weighted 2D FSE                                                                                                                                                                                                                  | Yes             | 7826.1  | 98      | 142            | 6.5     | 7.5          | 320×320     | 380×380                | 148                  |
| Diffusion-weighted imaging*                                                                                                                                                                                                         | Yes             | 8571.4  | 72.1    | 90             | 6       | 7.0          | 96×128      | 380×380                | 133                  |
| In- and out-of-phase T1-weighted imaging                                                                                                                                                                                            | No              | 5.3     | 2.3/1.1 | 12             | 4       | 2.0          | 288×180     | 390×390                | 14                   |
| Dynamic T1-weighted 3D GRE                                                                                                                                                                                                          | Yes             | 5.4     | 2.0     | 12             | 5       | 2.5          | 288×160     | 380×380                | 15                   |
| Note. —TR = repetition time; TE = echo time; ST = section thickness; FOV = field of view; 2D = two-dimensional; 3D = three-dimensional; FSE = fast spin-echo; GRE = gradient recall echo. * Images were acquired under free breath. |                 |         |         |                |         |              |             |                        |                      |



| Sequence                                                                                                                                                                                                                            | Fat suppression | TR (ms) | TE (ms) | Flip angle (°) | ST (mm) | Spacing (mm) | Matrix size | FOV (mm <sup>2</sup> ) | Acquisition Time (s) |
|-------------------------------------------------------------------------------------------------------------------------------------------------------------------------------------------------------------------------------------|-----------------|---------|---------|----------------|---------|--------------|-------------|------------------------|----------------------|
| <b>Testing dataset: Philips Achieva 3.0 T (16-channel body anterior coil)</b>                                                                                                                                                       |                 |         |         |                |         |              |             |                        |                      |
| T2-weighted 2D FSE                                                                                                                                                                                                                  | Yes             | 694.8   | 70.0    | 90             | 6       | 7            | 272×211     | 360×360                | 145                  |
| Diffusion-weighted imaging*                                                                                                                                                                                                         | Yes             | 3000    | 54.7    | 90             | 7       | 8            | 132×135     | 380×380                | 172                  |
| In- and out-of-phase T1-weighted imaging                                                                                                                                                                                            | No              | 177.2   | 1.9/1.2 | 55             | 7       | 8            | 164×180     | 380×380                | 36                   |
| Dynamic T1-weighted 3D GRE                                                                                                                                                                                                          | Yes             | 3       | 1.4     | 10             | 4       | 2            | 216×216     | 420×420                | 16                   |
| <b>Testing dataset: Philips Ingenia 3.0 T (Multi coil)</b>                                                                                                                                                                          |                 |         |         |                |         |              |             |                        |                      |
| T2-weighted 2D FSE                                                                                                                                                                                                                  | Yes             | 2725    | 77.6    | 90             | 5       | 6            | 296×58      | 432×432                | 126                  |
| Diffusion-weighted imaging*                                                                                                                                                                                                         | Yes             | 1405.1  | 55.2    | 90             | 5       | 6            | 120×116     | 384×384                | 168                  |
| In- and out-of-phase T1-weighted imaging                                                                                                                                                                                            | No              | 3.6     | 2.4/1.2 | 10             | 4       | 2            | 252×248     | 448×448                | 24                   |
| Dynamic T1-weighted 3D GRE                                                                                                                                                                                                          | Yes             | 3.8     | 0       | 10             | 4       | 2            | 268×266     | 480×480                | 14                   |
| Note. —TR = repetition time; TE = echo time; ST = section thickness; FOV = field of view; 2D = two-dimensional; 3D = three-dimensional; FSE = fast spin-echo; GRE = gradient recall echo. * Images were acquired under free breath. |                 |         |         |                |         |              |             |                        |                      |

| Sequence                                                                                                                                                                                                                            | Fat suppression | TR (ms) | TE (ms) | Flip angle (°) | ST (mm) | Spacing (mm) | Matrix size | FOV (mm <sup>2</sup> ) | Acquisition Time (s) |
|-------------------------------------------------------------------------------------------------------------------------------------------------------------------------------------------------------------------------------------|-----------------|---------|---------|----------------|---------|--------------|-------------|------------------------|----------------------|
| <b>Testing dataset: Siemens Verio 3.0 T (Tim coil)</b>                                                                                                                                                                              |                 |         |         |                |         |              |             |                        |                      |
| T2-weighted 2D FSE                                                                                                                                                                                                                  | Yes             | 1800    | 98      | 160            | 6       | 7.8          | 320×120     | 172×320                | 130                  |
| Diffusion-weighted imaging*                                                                                                                                                                                                         | Yes             | 1500    | 73      | 90             | 6       | 7.8          | 128×78      | 96×128                 | 128                  |
| In- and out-of-phase T1-weighted imaging                                                                                                                                                                                            | No              | 200     | 2.9/1.5 | 70             | 6       | 7.8          | 256×126     | 210×320                | 22                   |
| Dynamic T1-weighted 3D GRE                                                                                                                                                                                                          | Yes             | 3.9     | 1.4     | 9              | 3       | -            | 320×147     | 210×320                | 15                   |
| <b>Testing dataset: Siemens MAGNETOM Vida 3.0 T (18-channel body array coil)</b>                                                                                                                                                    |                 |         |         |                |         |              |             |                        |                      |
| T2-weighted 2D FSE                                                                                                                                                                                                                  | Yes             | 2500    | 91      | 160            | 5       | 14           | 256×256     | 480×640                | 121                  |
| Diffusion-weighted imaging*                                                                                                                                                                                                         | Yes             | 5600    | 44      | 90             | 6       | 7.5          | 134×108     | 216×268                | 137                  |
| In- and out-of-phase T1-weighted imaging                                                                                                                                                                                            | No              | 4.0     | 2.5/1.3 | 9              | 3       | -            | 320×195     | 260×320                | 14                   |
| Dynamic T1-weighted 3D GRE                                                                                                                                                                                                          | Yes             | 3.3     | 1.2     | 15             | 3       | -            | 352×232     | 290×352                | 15                   |
| Note. —TR = repetition time; TE = echo time; ST = section thickness; FOV = field of view; 2D = two-dimensional; 3D = three-dimensional; FSE = fast spin-echo; GRE = gradient recall echo. * Images were acquired under free breath. |                 |         |         |                |         |              |             |                        |                      |

| Sequence                                                             | Fat<br>suppression | TR<br>(ms) | TE<br>(ms) | Flip angle<br>(°) | ST<br>(mm) | Spacing<br>(mm) | Matrix<br>size | FOV<br>(mm <sup>2</sup> ) | Acquisition Time<br>(s) |
|----------------------------------------------------------------------|--------------------|------------|------------|-------------------|------------|-----------------|----------------|---------------------------|-------------------------|
| <b>Testing dataset: uMR780 3.0 T (12-channel body anterior coil)</b> |                    |            |            |                   |            |                 |                |                           |                         |
| T2-weighted 2D FSE                                                   | Yes                | 2140       | 103.3      | 100               | 6.5        | 1.3             | 256×256        | 380×300                   | 228                     |
| Diffusion-weighted imaging*                                          | Yes                | 4000       | 69.4       | 90                | 6.5        | 1.3             | 128×101        | 380×300                   | 147                     |
| In- and out-of-phase T1-weighted imaging                             | No                 | 148        | 2.9/1.5    | 70                | 6.5        | 1.3             | 272×174        | 400×320                   | 32                      |
| Dynamic T1-weighted 3D GRE                                           | Yes                | 3.4        | 1.6        | 10                | 4.5        | 1.5             | 320×204        | 400×300                   | 15                      |

Note. —TR = repetition time; TE = echo time; ST = section thickness; FOV = field of view; 2D = two-dimensional; 3D = three-dimensional; FSE = fast spin-echo; GRE = gradient recall echo. \* Images were acquired under free breath.

**Supplemental Table 2: Definitions of the imaging features.**

| Imaging features                                               | Definition                                                                                                                                                                                                                                              | Image sequence                                                                                                     |
|----------------------------------------------------------------|---------------------------------------------------------------------------------------------------------------------------------------------------------------------------------------------------------------------------------------------------------|--------------------------------------------------------------------------------------------------------------------|
| <b><i>LI-RADS major features</i></b>                           |                                                                                                                                                                                                                                                         |                                                                                                                    |
| Nonrim arterial phase hyperenhancement<br>(present vs. absent) | Nonrim-like enhancement of the tumor in the arterial phase unequivocally greater in whole or in part than the liver. (1,2)                                                                                                                              | Late arterial phase                                                                                                |
| Nonperipheral washout<br>(present vs. absent)                  | Nonperipheral visually assessed temporal reduction in the enhancement of the tumor in whole or in part relative to composite liver tissue in the portal venous phase or delayed phase. (1,2)                                                            | Portal venous or delayed phase for extracellular contrast agents or gadobenate; portal venous phase for gadoxetate |
| Enhancing capsule<br>(present vs. absent)                      | Smooth, uniform, sharp border around most or all of a tumor, unequivocally thicker or more conspicuous than fibrotic tissue around background nodules, and visible as enhancing rim in portal venous phase, delayed phase, or transitional phase. (1,2) | Portal venous, delayed, or transitional phase                                                                      |
| Tumor size (cm)                                                | Largest outer-edge-to-outer-edge dimension of a tumor. (1,2)                                                                                                                                                                                            | Pick the phase, sequence, plane in which the margins are clearest. Do not measure in arterial phase or DWI.        |
| <b><i>LI-RADS ancillary features</i></b>                       |                                                                                                                                                                                                                                                         |                                                                                                                    |
| Diffusion restriction<br>(present vs. absent)                  | Signal intensity of the tumor higher than the liver on diffusion-weighted images not caused only by T2 shine-through. (1,2)                                                                                                                             | High b value (e.g., ≥800) DWI                                                                                      |
| Mild-moderate T2 hyperintensity<br>(present vs. absent)        | Signal intensity of the tumor on T2WI higher than the liver, similar to or lower than a non-iron-overloaded spleen, and lower than simple fluid. (1,2)                                                                                                  | T2WI                                                                                                               |
| Corona enhancement<br>(present vs. absent)                     | Peritumoral enhancement in the late arterial phase or early portal venous phase. The enhancement is contiguous with and surrounds all or part of the tumor. (1,2)                                                                                       | Late arterial or early portal venous phase                                                                         |
| Nonenhancing capsule<br>(present vs. absent)                   | Subtype of capsule that does not show enhancement on any image. (1,2)                                                                                                                                                                                   | Multiple sequences                                                                                                 |
| Nodule-in-nodule architecture<br>(present vs. absent)          | Presence of smaller inner nodule within and having different imaging features than larger outer nodule. (1,2)                                                                                                                                           | Multiple sequences                                                                                                 |
| Mosaic architecture<br>(present vs. absent)                    | Presence of any combination of internal nodules, compartments, or septations, within a solid or mostly solid mass. (1,2)                                                                                                                                | Multiple sequences                                                                                                 |
| Blood products in mass<br>(present vs. absent)                 | Intralesional or perilesional hemorrhage in the absence of biopsy, trauma, or intervention. (1,2)                                                                                                                                                       | Multiple sequences                                                                                                 |
| Fat in mass, more than adjacent liver<br>(present vs. absent)  | Excess fat within a mass, in whole or in part, relative to the adjacent liver. (1,2)                                                                                                                                                                    | In-/opposed phase; fat-suppressed images compared to non-fat-suppressed images with similar or identical weighting |
| Fat sparing in solid mass<br>(present vs. absent)              | Relative paucity of fat in solid mass relative to steatotic liver OR in inner nodule relative to steatotic outer nodule. (1,2)                                                                                                                          | In-/opposed phase; fat-suppressed images compared to non-fat-suppressed images with similar or identical weighting |

|                                                                                        |                                                                                                                                                                                   |                                                                                                                    |
|----------------------------------------------------------------------------------------|-----------------------------------------------------------------------------------------------------------------------------------------------------------------------------------|--------------------------------------------------------------------------------------------------------------------|
| Iron sparing in solid mass<br>(present vs. absent)                                     | Paucity of iron in solid mass relative to iron-overloaded liver OR in inner nodule relative to siderotic outer nodule. (1,2)                                                      | In-/opposed phase; T2WI                                                                                            |
| Transitional phase hypointensity<br>(preset vs. absent)                                | Signal intensity of the tumor in the transitional phase unequivocally less, in whole or in part, than the liver. (1,2)                                                            | Transitional phase                                                                                                 |
| Hepatobiliary phase hypointensity<br>(preset vs. absent)                               | Signal intensity of the tumor in the hepatobiliary phase unequivocally less, in whole or in part, than the liver. (1,2)                                                           | Hepatobiliary phase                                                                                                |
| Marked T2 hyperintensity<br>(present vs. absent)                                       | Signal intensity of the tumor on T2WI higher than non-iron-overloaded spleen and as high as or almost as high as simple fluid. (1,2)                                              | T2WI                                                                                                               |
| Iron in mass, more than liver<br>(present vs. absent)                                  | Excess iron in a mass relative to the background liver. (1,2)                                                                                                                     | In-/opposed phase; T2WI                                                                                            |
| Parallels blood pool enhancement<br>(present vs. absent)                               | Temporal pattern in which enhancement approximates blood pool in all phases. (1,2)                                                                                                | Post-contrast phases                                                                                               |
| Undistorted vessels<br>(present vs. absent)                                            | Vessels traversing a tumor without displacement, deformation, or other alteration. (1,2)                                                                                          | Post-contrast phases                                                                                               |
| <b><i>LR-M features</i></b>                                                            |                                                                                                                                                                                   |                                                                                                                    |
| Rim arterial phase hyperenhancement<br>(present vs. absent)                            | Spatially defined subtype of arterial phase hyperenhancement in which arterial phase enhancement is most pronounced in tumor periphery. (1,2)                                     | Late arterial phase                                                                                                |
| Peripheral washout<br>(present vs. absent)                                             | Presence of apparent washout most pronounced in the tumor periphery. (1,2)                                                                                                        | Portal venous or delayed phase for extracellular contrast agents or gadobenate; portal venous phase for gadoxetate |
| Delayed central enhancement<br>(present vs. absent)                                    | Central area of progressive postarterial phase enhancement. (1,2)                                                                                                                 | Postarterial phases                                                                                                |
| Targetoid restriction<br>(present vs. absent)                                          | Concentric pattern on diffusion-weighted imaging characterized by restricted diffusion in tumor periphery with less restricted diffusion in tumor center. (1,2)                   | DWI or ADC map                                                                                                     |
| Targetoid transitional phase or hepatobiliary phase appearance<br>(present vs. absent) | Concentric pattern in transitional or hepatobiliary phase characterized by moderate-to-marked hypointensity in the tumor periphery with milder hypointensity in the center. (1,2) | Transitional or hepatobiliary phase                                                                                |
| Marked diffusion restriction<br>(present vs. absent)                                   | Signal intensity of the tumor similar to or higher than non-iron-overloaded spleen on diffusion-weighted images not caused only by T2 shine-through. (1,2)                        | High b value (e.g., ≥800) DWI                                                                                      |
| Infiltrative appearance<br>(present vs. absent)                                        | Presence of a non-circumscribed tumor margin (indistinct transition) thought to represent a permeative growth pattern. (1,2)                                                      | Multiple sequences                                                                                                 |
| Necrosis or severe ischemia<br>(present vs. absent)                                    | Presence of nonenhancing area in a solid mass, not attributable to a cystic component, prior treatment, or intralesional hemorrhage. (1,2)                                        | Post-contrast phases and T2WI                                                                                      |
| <b><i>Other tumor-related prognostic features</i></b>                                  |                                                                                                                                                                                   |                                                                                                                    |

|                                                                                                                  |                                                                                                                                                                                                                                                   |                              |
|------------------------------------------------------------------------------------------------------------------|---------------------------------------------------------------------------------------------------------------------------------------------------------------------------------------------------------------------------------------------------|------------------------------|
| Pre-contrast T1-weighted hypointensity (present vs. absent)                                                      | Signal intensity of the tumor on pre-contrast T1-weighted imaging unequivocally lower than that of the liver.                                                                                                                                     | Pre-contrast T1WI            |
| T2-weighted peritumoral hyperintensity (present vs. absent)                                                      | Presence of irregular, wedge-shaped, or flame-like area adjacent to the tumor on T2WI of which the signal intensity is mildly or moderately higher than liver and similar to or less than a non-iron-overloaded spleen. (3,4)                     | T2WI                         |
| Portal venous phase peritumoral hypoenhancement (present vs. absent)                                             | Presence of irregular, wedge-shaped, or flame-like hypoenhancing area adjacent to the tumor in the portal venous phase. (3,4)                                                                                                                     | Portal venous phase          |
| Arterial phase hyperenhancement proportion (<50% vs. ≥50%)                                                       | Proportion of tumor volume demonstrating arterial phase hyperenhancement. (5)                                                                                                                                                                     | Late arterial phase          |
| Intratumoral artery (present vs. absent)                                                                         | Presence of discrete arteries within the tumor on arterial phase images. (3,6,7)                                                                                                                                                                  | Early or late arterial phase |
| Capsule integrity (complete vs. incomplete)                                                                      | Tumor capsule is complete when non-disrupted capsule is detected in all imaging planes, otherwise incomplete. (3,8)                                                                                                                               | Multiple sequences           |
| Tumor margin (nonsmooth vs. smooth)                                                                              | Nonsmooth: the tumor margin is irregular and/or has areas of bulging, nodular projection, or infiltration into adjacent tissues at the tumor periphery in any imaging plane.<br>Smooth: the tumor margin is smooth in all imaging planes. (3,7,9) | Multiple sequences           |
| Marked hepatobiliary phase hypointensity (present vs. absent)                                                    | Signal intensity of the tumor in the hepatobiliary phase lower than that of the liver and similar to or lower than that of intrahepatic vessels. (10)                                                                                             | Hepatobiliary phase          |
| Hepatobiliary phase peritumoral hypointensity (present vs. absent)                                               | Presence of irregular, wedge-shaped or flame-like hypointense area of liver parenchyma located outside of the tumor margin in the hepatobiliary phase. (3,4,10,11)                                                                                | Hepatobiliary phase          |
| The VICT2 trait (present vs. absent)                                                                             | The VICT2 trait is present when portal venous phase peritumoral hypoenhancement is present; or when corona enhancement, T2-weighted peritumoral mild-moderate hyperintensity, and incomplete capsule are all present; otherwise, absent. (4)      | Multiple sequences           |
| The two-trait predictor of venous invasion (present vs. absent)                                                  | Presence of intratumoral artery coupled with absence of nonenhancing "capsule". (6,7)                                                                                                                                                             | Multiple sequences           |
| Tumor growth subtype (12,13)                                                                                     |                                                                                                                                                                                                                                                   | Multiple sequences           |
| Simple nodular type                                                                                              | A round expanding nodule with a distinct margin in all imaging planes.                                                                                                                                                                            |                              |
| Non-simple nodular type                                                                                          | An expanding tumor with areas of bulging or nodular extranodular projection, a cluster of small and confluent nodules, or the presence of an indistinct margin thought the entire tumor.                                                          |                              |
| <b><i>Imaging features associated with the severity of underlying liver diseases and portal hypertension</i></b> |                                                                                                                                                                                                                                                   |                              |
| Ascites (present vs. absent)                                                                                     | Presence of free fluid in abdomen or pelvis. (14)                                                                                                                                                                                                 | T2WI                         |

|                                                          |                                                                                                                                                                                                                                                                                                                                                                                                                                                                                                                                                                       |                                                                                                                    |
|----------------------------------------------------------|-----------------------------------------------------------------------------------------------------------------------------------------------------------------------------------------------------------------------------------------------------------------------------------------------------------------------------------------------------------------------------------------------------------------------------------------------------------------------------------------------------------------------------------------------------------------------|--------------------------------------------------------------------------------------------------------------------|
| Radiologically-evident cirrhosis<br>(present vs. absent) | Unequivocal morphological alterations of the liver, including surface nodularity, small liver volume, expansion of space between liver and anterior abdominal wall and perihilar, gallbladder fossa and ligamentum teres spaces, hypertrophy of caudate and/or left lateral section, atrophy of anterior right section and/or left medial section, anterolateral flattening, notching of posterior medial right lobe and parenchymal nodules, with or without manifestations of portal hypertension (portal-systemic collaterals, splenomegaly and/or ascites). (1,2) | Multiple sequences                                                                                                 |
| Diffuse iron overload<br>(present vs. absent)            | Diffuse signal intensity drop of the liver parenchyma on in-phase images compared with the out-of-phase images. (1,2)                                                                                                                                                                                                                                                                                                                                                                                                                                                 | In-/opposed phase; T2WI                                                                                            |
| Diffuse fatty change<br>(present vs. absent)             | Diffuse signal intensity drop of the liver parenchyma on out-of-phase images compared with the in-phase images. (1,2)                                                                                                                                                                                                                                                                                                                                                                                                                                                 | In-/opposed phase; fat-suppressed images compared to non-fat-suppressed images with similar or identical weighting |
| Width of main portal vein (cm)                           | Diameter of main portal vein, which is measured at least 1cm distal to the confluence of splenic and superior mesenteric vein and at least 1cm proximal to the first branch of the main portal vein, to avoid effect of convergence/divergence on coronal images. (15)                                                                                                                                                                                                                                                                                                | Coronal images of the portal venous or delayed phase                                                               |
| Splenomegaly<br>(present vs. absent)                     | Craniocaudal diameter of the spleen>12cm. (14,16,17)                                                                                                                                                                                                                                                                                                                                                                                                                                                                                                                  | Multiple sequences                                                                                                 |
| Porto-systemic shunts<br>(present vs. absent)            | Enhancing tortuous channels in esophageal, epigastric, perisplenic, paraumbilical or retroperitoneal locations. (14)                                                                                                                                                                                                                                                                                                                                                                                                                                                  | Portal venous or delayed phase                                                                                     |
| Esophageal gastric varices<br>(present vs. absent)       | Discrete enhancing tortuous channel abutting the luminal surface of the esophageal or gastric wall or contacting/ protruding into luminal space. (14)                                                                                                                                                                                                                                                                                                                                                                                                                 | Portal venous or delayed phase                                                                                     |

## References:

1. CT/MRI Liver Imaging Reporting and Data System version 2018. American College of Radiology Web site. <https://www.acr.org/Clinical-Resources/Reporting-andData-Systems/LI-RADS/CTMRI-LI-RADS-v2018>. Accessed 1 September 2021.
2. LI-RADS Lexicon (terms and definitions). American College of Radiology Web site. <https://www.acr.org/-/media/ACR/Files/RADS/LI-RADS/LIRADS-Lexicon-Table.pdf>. Accessed 1 September 2021.
3. Jiang H, Wei J, Fu F, et al. Predicting microvascular invasion in hepatocellular carcinoma: a dual-institution study on gadoxetate disodium-enhanced MRI. *Liver Int.* 2022;42(5):1158-1172.
4. Jiang H, Wei H, Yang T, et al. VICT2 Trait: Prognostic Alternative to Peritumoral Hepatobiliary Phase Hypointensity in HCC. *Radiology.* 2023 Feb 14:221835.
5. Rhee H, Cho ES, Nahm JH, et al. Gadoxetic acid-enhanced MRI of macrotrabecular-massive hepatocellular carcinoma and its prognostic implications. *J Hepatol.* 2021;74(1):109-121.
6. Segal E, Sirlin CB, Ooi C, Adler AS, Gollub J, Chen X, et al. Decoding global gene expression programs in liver cancer by noninvasive imaging. *Nat Biotechnol* 2007; 25:675–680.
7. Renzulli M, Brocchi S, Cucchetti A, Mazzotti F, Mosconi C, Sportoletti C, et al. Can Current Preoperative Imaging Be Used to Detect Microvascular Invasion of Hepatocellular Carcinoma? *Radiology* 2016;279(2):432-442.
8. Lei Z, Li J, Wu D, Xia Y, Wang Q, Si A, et al. Nomogram for Preoperative Estimation of Microvascular Invasion Risk in Hepatitis B Virus-Related Hepatocellular Carcinoma Within the Milan Criteria. *JAMA* 2016;151(4):356-363.
9. An C, Kim DW, Park YN, Chung YE, Rhee H, Kim MJ. Single hepatocellular carcinoma: preoperative MR imaging to predict early recurrence after curative resection. *Radiology* 2015; 276:433–443.

10. Fowler KJ, Chernyak V, Ronot M, et al. Hepatocellular Carcinoma: It Is Time to Focus on Prognosis. *Radiology*. 2023;220884.
11. Lee S, Kim SH, Lee JE, Sinn DH, Preoperative gadoxetic acid-enhanced MRI for predicting microvascular invasion in patients with single hepatocellular carcinoma. *J Hepatol* 2017;67(3):526-534.
12. Rhee H, Chung T, Yoo JE, et al. Gross type of hepatocellular carcinoma reflects the tumor hypoxia, fibrosis, and stemness-related marker expression. *Hepatol Int*. 2020;14(2):239-248.
13. Burt AD, Alves V, Bedossa P, et al. Data set for the reporting of intrahepatic cholangiocarcinoma, perihilar cholangiocarcinoma and hepatocellular carcinoma: recommendations from the International Collaboration on Cancer Reporting (ICCR). *Histopathology*. 2018;73:369–85.
14. Venkatesh SK, Yin M, Takahashi N, et al. Non-invasive detection of liver fibrosis: MR imaging features vs. MR elastography. *Abdom Imaging*. 2015;40(4):766-75.
15. Stamm ER, Meier JM, Pokharel SS, et al. Normal main portal vein diameter measured on CT is larger than the widely referenced upper limit of 13 mm. *Abdom Radiol (NY)*. 2016;41(10):1931-6.
16. Rustogi R, Horowitz J, Harmath C, et al. Accuracy of MR elastography and anatomic MR imaging features in the diagnosis of severe hepatic fibrosis and cirrhosis. *J Magn Reson Imaging*. 2012;35(6):1356-64.
17. Marasco G, Colecchia A, Colli A, et al. Role of liver and spleen stiffness in predicting the recurrence of hepatocellular carcinoma after resection. *J Hepatol*. 2019;70(3):440-448.



**Supplemental Table 3. Univariable logistic analyses of all non-invasive predictors for the high-risk histopathology based on majority interpretations of the training dataset.**

| Characteristics                                                        | Univariable logistic analysis |              |
|------------------------------------------------------------------------|-------------------------------|--------------|
|                                                                        | Odds ratio                    | P value      |
| <b>Clinical and laboratory variables</b>                               |                               |              |
| Age (y)                                                                | 0.99 (0.92-1.01)              | 0.38         |
| Sex (male vs. female)                                                  | 0.62 (0.35-1.09)              | 0.10         |
| Chronic hepatitis B (yes vs. no)                                       | 1.13 (0.26-4.79)              | 0.87         |
| The Barcelona Clinic Liver Cancer stage (A vs. 0)                      | 1.79 (1.09-2.94)              | <b>0.02</b>  |
| Cirrhosis (yes vs. no)                                                 | 0.99 (0.63-1.56)              | 0.99         |
| The Child-Pugh score                                                   | 0.79 (0.37-1.69)              | 0.54         |
| The Child-Pugh class (B vs. A)                                         | 0.49 (0.05-4.77)              | 0.54         |
| The albumin-bilirubin score                                            | 1.36 (0.78-2.37)              | 0.28         |
| The albumin-bilirubin grade (2 vs. 1)                                  | 1.48 (0.84-2.62)              | 0.17         |
| Alpha-fetoprotein (>100 ng/mL vs. ≤100 ng/mL)                          | 1.98 (1.27-3.11)              | <b>0.003</b> |
| Aspartate aminotransferase (IU/L)                                      | 1.00 (0.99-1.01)              | 0.48         |
| Aspartate aminotransferase (IU/L)*                                     | 1.05 (0.63-1.74)              | 0.86         |
| Aspartate aminotransferase (>35 IU/L vs. ≤35 IU/L)                     | 1.09 (0.67-1.75)              | 0.74         |
| Alanine aminotransferase (IU/L)                                        | 1.00 (0.99-1.01)              | 0.77         |
| Alanine aminotransferase (IU/L)*                                       | 1.03 (0.72-1.49)              | 0.86         |
| Alanine aminotransferase (>40 IU/L vs. ≤40 IU/L)                       | 1.05 (0.65-1.68)              | 0.85         |
| Total bilirubin (umol/L)                                               | 1.00 (0.96-1.04)              | 0.96         |
| Total bilirubin (umol/L)*                                              | 1.26 (0.35-4.55)              | 0.72         |
| Total bilirubin (>40 umol/L vs. ≤40 umol/L)                            | ...                           | ...          |
| Albumin (g/L)                                                          | 0.97 (0.93-1.02)              | 0.30         |
| Albumin (g/L)*                                                         | 1.51 (0.33-6.98)              | 0.60         |
| Albumin (<40 g/L vs. ≥40 g/L)                                          | 1.29 (0.75-2.23)              | 0.36         |
| Platelet count (×10 <sup>9</sup> /L)                                   | 1.00 (1.00-1.01)              | 0.49         |
| Platelet count (×10 <sup>9</sup> /L)*                                  | 1.12 (0.72-1.75)              | 0.62         |
| Platelet count (<100×10 <sup>9</sup> /L vs. ≥100×10 <sup>9</sup> /L)   | 1.19 (0.77-1.86)              | 0.43         |
| Neutrophil count (×10 <sup>9</sup> /L)                                 | 1.00 (0.89-1.14)              | 0.95         |
| Neutrophil count (×10 <sup>9</sup> /L)*                                | 1.07 (0.65-1.77)              | 0.78         |
| Neutrophil count (≤6.3×10 <sup>9</sup> /L vs. >6.3×10 <sup>9</sup> /L) | 1.50 (0.43-5.30)              | 0.53         |
| Lymphocyte count (×10 <sup>9</sup> /L)                                 | 0.97 (0.70-1.35)              | 0.87         |
| Lymphocyte count (×10 <sup>9</sup> /L)*                                | 1.04 (0.64-1.70)              | 0.88         |
| The neutrophil-to-lymphocyte ratio                                     | 1.01 (0.95-1.08)              | 0.73         |
| Prothrombin time (s)                                                   | 1.03 (0.85-1.26)              | 0.73         |
| Prothrombin time (s)*                                                  | 1.65 (0.15-18.02)             | 0.68         |
| Prothrombin time (>12.8 s vs. ≤12.8 s)                                 | 0.92 (0.50-1.68)              | 0.78         |
| International normalized ratio                                         | 0.91 (0.11-7.75)              | 0.93         |
| International normalized ratio*                                        | 0.99 (0.10-9.53)              | >0.99        |
| International normalized ratio (>1.15 vs. ≤1.15)                       | 0.85 (0.42-1.71)              | 0.65         |
| <b>MR imaging variables</b>                                            |                               |              |
| <b>LI-RADS major features</b>                                          |                               |              |

|                                                                      |                   |                  |
|----------------------------------------------------------------------|-------------------|------------------|
| Nonrim arterial phase hyperenhancement (present vs. absent)          | 0.65 (0.29-1.45)  | 0.29             |
| Nonperipheral washout (present vs. absent)                           | 1.60 (0.97-2.63)  | 0.07             |
| Enhancing capsule (present vs. absent)                               | 1.55 (0.68-3.51)  | 0.29             |
| Tumor size (cm)                                                      | 1.31 (1.06-1.62)  | <b>0.01</b>      |
| <b>LI-RADS ancillary features</b>                                    |                   |                  |
| Corona enhancement (present vs. absent)                              | 2.23 (1.39-3.57)  | <b>&lt;0.001</b> |
| Mosaic architecture (present vs. absent)                             | 1.44 (0.69-3.02)  | 0.33             |
| Blood products in mass (present vs. absent)                          | 1.19 (0.58-2.44)  | 0.63             |
| Diffusion restriction (present vs. absent)                           | ...               | ...              |
| Mild-moderate T2 hyperintensity (present vs. absent)                 | 1.01 (0.35-2.91)  | 0.99             |
| Nonenhancing capsule (present vs. absent)                            | 0.99 (0.16-6.00)  | 0.99             |
| Fat in mass, more than adjacent liver (present vs. absent)           | 0.84 (0.53-1.32)  | 0.45             |
| Fat sparing in solid mass (present vs. absent)                       | 0.79 (0.31-2.03)  | 0.62             |
| Iron sparing in solid mass (present vs. absent)                      | 0.59 (0.34-1.01)  | 0.054            |
| Transitional phase hypointensity (present vs. absent)†               | 1.11 (0.27-4.62)  | 0.89             |
| Hepatobiliary phase hypointensity (present vs. absent)†              | 2.85 (0.32-25.04) | 0.35             |
| Marked T2 hyperintensity (present vs. absent)                        | 1.82 (0.54-6.08)  | 0.33             |
| Nodule-in-nodule architecture (present vs. absent)                   | 1.34 (0.82-2.18)  | 0.25             |
| Iron in mass, more than liver (present vs. absent)                   | ...               | ...              |
| Parallels blood pool enhancement (present vs. absent)                | ...               | ...              |
| Undistorted vessels (present vs. absent)                             | ...               | ...              |
| <b>LR-M features</b>                                                 |                   |                  |
| Rim arterial phase hyperenhancement (present vs. absent)             | 2.35 (0.93-5.90)  | 0.07             |
| Peripheral washout (present vs. absent)                              | 1.49 (0.09-24.01) | 0.78             |
| Delayed central enhancement (present vs. absent)                     | 0.29 (0.03-2.53)  | 0.26             |
| Targetoid diffusion restriction (present vs. absent)                 | ...               | ...              |
| Targetoid TP or HBP appearance (present vs. absent)†                 | 1.83 (0.11-29.86) | 0.67             |
| Marked diffusion restriction (present vs. absent)                    | 0.72 (0.35-1.45)  | 0.72             |
| Infiltrative appearance (present vs. absent)                         | 3.82 (0.73-19.96) | 0.11             |
| Necrosis or severe ischemia (present vs. absent)                     | 2.39 (1.33-4.30)  | <b>0.004</b>     |
| <b>LI-RADS category</b>                                              |                   |                  |
| LR-5                                                                 | Ref               | ...              |
| LR-4                                                                 | 0.63 (0.32-1.27)  | 0.20             |
| LR-M                                                                 | 2.09 (0.77-5.64)  | 0.15             |
| <b>Other tumor-related prognostic features</b>                       |                   |                  |
| Precontrast T1-weighted hypointensity (yes vs. no)                   | 1.86 (0.71-4.88)  | 0.21             |
| Peritumoral mild-moderate T2 hypointensity (present vs. absent)      | 3.79 (1.93-7.46)  | <b>&lt;0.001</b> |
| Portal venous phase peritumoral hypoenhancement (present vs. absent) | 3.71 (1.75-7.86)  | <b>&lt;0.001</b> |
| Arterial phase hyperenhancement proportion (<50% vs. ≥50%)           | 1.15 (0.70-1.87)  | 0.58             |
| Intratumoral arteries (present vs. absent)                           | 1.41 (0.74-2.70)  | 0.30             |
| Capsule integrity (complete vs. incomplete)                          | 0.50 (0.31-0.79)  | <b>0.003</b>     |
| Tumor margin (nonsmooth vs. smooth)                                  | 1.83 (1.15-2.91)  | <b>0.01</b>      |
| Marked HBP hypointensity (present vs. absent)†                       | 2.17 (1.09-4.33)  | <b>0.03</b>      |
| HBP peritumoral hypointensity (present vs. absent)†                  | 2.16 (1.04-4.49)  | <b>0.04</b>      |
| The VICT2 trait (present vs. absent)                                 | 5.18 (2.81-9.55)  | <b>&lt;0.001</b> |
| The two-trait predictor of venous invasion (present vs. absent)      | 1.41 (0.74-2.70)  | 0.30             |

|                                                                                                                  |                  |                  |
|------------------------------------------------------------------------------------------------------------------|------------------|------------------|
| Tumor growth subtype (non-simple nodular type vs. simple nodular type)                                           | 2.11 (1.36-3.28) | <b>&lt;0.001</b> |
| Involvement of liver capsule (yes vs. no)                                                                        | 0.86 (0.56-1.33) | 0.51             |
| <b><i>Imaging features associated with the severity of underlying liver diseases and portal hypertension</i></b> |                  |                  |
| Ascites (present vs. absent)                                                                                     | 0.33 (0.09-1.17) | 0.09             |
| Radiologically-evident cirrhosis (present vs. absent)                                                            | 1.17 (0.71-1.92) | 0.54             |
| Diffuse iron overload (present vs. absent)                                                                       | 0.71 (0.44-1.15) | 0.16             |
| Diffuse fatty change (present vs. absent)                                                                        | 1.35 (0.72-2.54) | 0.35             |
| Width of main portal vein (cm)                                                                                   | 0.46 (0.17-1.26) | 0.13             |
| Splenomegaly (present vs. absent)                                                                                | 1.07 (0.71-1.62) | 0.75             |
| Porto-systemic shunts (present vs. absent)                                                                       | 1.24 (0.79-1.94) | 0.35             |
| Esophageal gastric varices (present vs. absent)                                                                  | 1.22 (0.79-1.88) | 0.37             |

Note.—Unless stated otherwise, data in parentheses are 95% confidence intervals.

\*Data are computed after logarithmic transformation.

†Data are presented for training dataset patients who underwent hepatobiliary contrast agent-enhanced MRI (n=152).

LI-RADS = Liver Imaging Reporting and Data System; TP = transitional phase; HBP = hepatobiliary phase.

**Supplemental Table 4. Frequencies and inter-rater agreement for all analysed MR imaging features.**

| Imaging features                                                       | Frequency                            |                                     |                                    | $\kappa$ value or ICC*               |                                     |                                    | Agreement                            |                                     |                                    |
|------------------------------------------------------------------------|--------------------------------------|-------------------------------------|------------------------------------|--------------------------------------|-------------------------------------|------------------------------------|--------------------------------------|-------------------------------------|------------------------------------|
|                                                                        | Training dataset<br>( <i>n</i> =343) | Testing dataset<br>( <i>n</i> =113) | The RFA cohort<br>( <i>n</i> =121) | Training dataset<br>( <i>n</i> =343) | Testing dataset<br>( <i>n</i> =113) | The RFA cohort<br>( <i>n</i> =121) | Training dataset<br>( <i>n</i> =343) | Testing dataset<br>( <i>n</i> =113) | The RFA cohort<br>( <i>n</i> =121) |
| Tumor size (cm)                                                        | ...                                  | ...                                 | ...                                | 0.982 (0.977-0.986)                  | 0.992 (0.989-0.994)                 | 0.979 (0.971-0.984)                | Excellent                            | Excellent                           | Excellent                          |
| Corona enhancement (present vs. absent)                                | 102 (29.7)                           | 45 (39.8)                           | 28 (23.1)                          | 0.304 (0.221-0.386)                  | 0.468 (0.349-0.588)                 | 0.457 (0.354-0.559)                | Fair                                 | Moderate                            | Moderate                           |
| Peritumoral mild-moderate T2 hypointensity (present vs. absent)        | 44 (12.8)                            | 23 (20.4)                           | 25 (20.7)                          | 0.468 (0.386-0.550)                  | 0.485 (0.366-0.604)                 | 0.452 (0.349-0.555)                | Moderate                             | Moderate                            | Moderate                           |
| Portal venous phase peritumoral hypoenhancement (present vs. absent)   | 35 (10.2)                            | 20 (17.7)                           | 11 (9.1)                           | 0.397 (0.315-0.479)                  | 0.577 (0.458-0.696)                 | 0.489 (0.387-0.592)                | Fair                                 | Moderate                            | Moderate                           |
| Capsule integrity (complete vs. incomplete)                            | 124 (36.2)                           | 35 (31.0)                           | 64 (52.9)                          | 0.396 (0.314-0.478)                  | 0.447 (0.328-0.566)                 | 0.389 (0.286-0.492)                | Fair                                 | Moderate                            | Fair                               |
| The VICT2 trait (present vs. absent)                                   | 61 (17.8)                            | 32 (28.3)                           | 18 (14.9)                          | 0.439 (0.357-0.521)                  | 0.494 (0.375-0.613)                 | 0.512 (0.409-0.615)                | Moderate                             | Moderate                            | Moderate                           |
| Tumor growth subtype (non-simple nodular type vs. simple nodular type) | 171 (49.9)                           | 74 (65.5)                           | 40 (33.1)                          | 0.367 (0.284-0.449)                  | 0.499 (0.380-0.618)                 | 0.586 (0.483-0.689)                | Fair                                 | Moderate                            | Moderate                           |

Note.—Unless stated otherwise, data in parentheses are percentages or 95% confidence intervals.

\* Interobserver agreement was investigated by computing the Fleiss'  $\kappa$  value for binary variables and the intraclass correlation coefficient (ICC) for tumor size. Agreement was considered poor ( $\kappa$  or ICC < 0.0), slight ( $\kappa$  or ICC: 0.2-0.4), fair ( $\kappa$  or ICC: 0.2-0.4), moderate ( $\kappa$  or ICC: 0.4-0.6), substantial ( $\kappa$  or ICC: 0.6-0.8), or excellent ( $\kappa$  or ICC > 0.8).

RFA = radiofrequency ablation; ICC = intraclass correlation coefficient; LI-RADS = Liver Imaging Reporting and Data System.

**Supplemental Table 5. Uni- and multivariable Cox regression analyses of the MHG trait and known prognostic factors for recurrence-free survival.**

| Characteristics                                                            | Univariable Cox analysis |                  | Multivariable Cox analysis* |                  |
|----------------------------------------------------------------------------|--------------------------|------------------|-----------------------------|------------------|
|                                                                            | Hazard ratio             | P value          | Hazard ratio                | P value          |
| <b>The resection cohort, training dataset (n=274)</b>                      |                          |                  |                             |                  |
| The MHG trait (positive vs. negative)                                      | 1.86 (1.22-2.85)         | <b>0.004</b>     | 1.61 (1.03-2.51)            | <b>0.04</b>      |
| <b>Clinical prognostic factors</b>                                         |                          |                  |                             |                  |
| Age (years)                                                                | 0.99 (0.97-1.01)         | 0.43             | ...                         | ...              |
| Sex (male vs. female)                                                      | 0.77 (0.43-1.40)         | 0.39             | ...                         | ...              |
| Chronic hepatitis B virus infection (yes vs. no)                           | 1.87 (0.76-4.61)         | 0.17             | ...                         | ...              |
| Cirrhosis (present vs. absent)                                             | 1.17 (0.75-1.82)         | 0.50             | ...                         | ...              |
| Tumor size (cm)                                                            | 1.38 (1.13-1.68)         | <b>0.001</b>     | 1.29 (1.05-1.58)            | <b>0.02</b>      |
| The Barcelona Clinic Liver Cancer stage (A vs. 0)                          | 1.80 (1.08-2.99)         | <b>0.02</b>      | ...                         | ...              |
| The albumin-bilirubin grade (2 vs. 1)                                      | 2.23 (1.35-3.69)         | <b>0.002</b>     | 2.23 (1.35-3.69)            | <b>0.002</b>     |
| Aspartate aminotransferase (IU/L)                                          | 1.00 (0.99-1.01)         | 0.81             | ...                         | ...              |
| Alanine aminotransferase (IU/L)                                            | 1.00 (0.99-1.00)         | 0.37             | ...                         | ...              |
| Total bilirubin (umol/L)                                                   | 1.00 (0.96-1.04)         | 0.95             | ...                         | ...              |
| Albumin (g/L)                                                              | 0.97 (0.92-1.02)         | 0.21             | ...                         | ...              |
| Platelet count ( $\times 10^9/L$ )                                         | 1.00 (0.99-1.00)         | 0.24             | ...                         | ...              |
| Prothrombin time (s)                                                       | 1.09 (0.89-1.33)         | 0.42             | ...                         | ...              |
| <b>Treatment-associated prognostic factors</b>                             |                          |                  |                             |                  |
| Adjuvant therapy (yes vs. no)                                              | 0.94 (0.59-1.50)         | 0.79             | ...                         | ...              |
| <b>The resection cohort, testing dataset (n=85)</b>                        |                          |                  |                             |                  |
| The MHG trait (positive vs. negative)                                      | 4.02 (1.42-11.37)        | <b>0.009</b>     | 3.55 (1.25-10.10)           | <b>0.02</b>      |
| <b>Clinical prognostic factors</b>                                         |                          |                  |                             |                  |
| Age (years)                                                                | 0.99 (0.95-1.04)         | 0.77             | ...                         | ...              |
| Sex (male vs. female)                                                      | ...                      | 0.95             | ...                         | ...              |
| Chronic hepatitis B virus infection (yes vs. no)                           | 0.87 (0.20-3.82)         | 0.86             | ...                         | ...              |
| Cirrhosis (present vs. absent)                                             | 1.06 (0.41-2.77)         | 0.91             | ...                         | ...              |
| Tumor size (cm)                                                            | 1.68 (1.14-2.46)         | <b>0.009</b>     | 1.57 (1.08-2.26)            | <b>0.02</b>      |
| The Barcelona Clinic Liver Cancer stage (A vs. 0)                          | ...                      | 0.96             | ...                         | ...              |
| The albumin-bilirubin grade (2 vs. 1)                                      | 0.63 (0.22-1.78)         | 0.38             | ...                         | ...              |
| Aspartate aminotransferase (IU/L)                                          | 1.00 (0.99-1.01)         | 0.61             | ...                         | ...              |
| Alanine aminotransferase (IU/L)                                            | 1.00 (1.00-1.01)         | 0.40             | ...                         | ...              |
| Total bilirubin (umol/L)                                                   | 1.02 (0.97-1.09)         | 0.41             | ...                         | ...              |
| Albumin (g/L)                                                              | 1.06 (0.96-1.17)         | 0.23             | ...                         | ...              |
| Platelet count ( $\times 10^9/L$ )                                         | 1.00 (0.99-1.01)         | 0.62             | ...                         | ...              |
| Prothrombin time (s)                                                       | 0.97 (0.72-1.30)         | 0.82             | ...                         | ...              |
| <b>Treatment-associated prognostic factors</b>                             |                          |                  |                             |                  |
| Adjuvant therapy (yes vs. no)                                              | 0.89 (0.32-2.49)         | 0.82             | ...                         | ...              |
| <b>The RFA cohort (n=121)</b>                                              |                          |                  |                             |                  |
| The MHG trait (positive vs. negative)                                      | 3.20 (1.92-5.35)         | <b>&lt;0.001</b> | 3.45 (2.01-5.80)            | <b>&lt;0.001</b> |
| The IMBRAVE 050-defined high-risk status (present vs. absent) <sup>†</sup> | 2.01 (1.21-3.33)         | <b>0.007</b>     | ...                         | ...              |
| <b>Clinical prognostic factors</b>                                         |                          |                  |                             |                  |
| Age (years)                                                                | 1.01 (0.99-1.03)         | 0.37             | ...                         | ...              |
| Sex (male vs. female)                                                      | 2.23 (1.02-4.88)         | <b>0.046</b>     | ...                         | ...              |
| Chronic hepatitis B virus infection (yes vs. no)                           | 0.53 (0.29-0.97)         | <b>0.04</b>      | 0.46 (0.25-0.84)            | <b>0.01</b>      |
| Cirrhosis (present vs. absent)                                             | 0.99 (0.57-1.72)         | 0.97             | ...                         | ...              |
| Tumor size (cm)                                                            | 1.64 (1.22-2.20)         | <b>&lt;0.001</b> | ...                         | ...              |
| The Barcelona Clinic Liver Cancer stage (A vs. 0)                          | 2.01 (1.21-3.33)         | <b>0.007</b>     | ...                         | ...              |
| The albumin-bilirubin grade (2/3 vs. 1)                                    | 1.02 (0.63-1.66)         | 0.94             | ...                         | ...              |
| Aspartate aminotransferase (IU/L)                                          | 1.01 (0.996-1.02)        | 0.19             | ...                         | ...              |
| Alanine aminotransferase (IU/L)                                            | 1.01 (1.00-1.02)         | 0.13             | ...                         | ...              |
| Total bilirubin (umol/L)                                                   | 1.00 (0.97-1.02)         | 0.70             | ...                         | ...              |
| Albumin (g/L)                                                              | 1.00 (0.95-1.05)         | 0.98             | ...                         | ...              |
| Platelet count ( $\times 10^9/L$ )                                         | 1.00 (1.00-1.01)         | 0.90             | ...                         | ...              |
| Prothrombin time (s)                                                       | 0.99 (0.83-1.19)         | 0.95             | ...                         | ...              |
| <b>Treatment-associated prognostic factors</b>                             |                          |                  |                             |                  |
| Adjuvant therapy (yes vs. no)                                              | 0.63 (0.30-1.33)         | 0.23             | ...                         | ...              |

---

Note.—Unless stated otherwise, data in parentheses are 95% confidence intervals. *P* values<0.05 are highlighted in bold.

\*To avoid overfitting, variables with *P*<0.05 at the univariable Cox regression analyses were analyzed in the multivariable Cox regression models.

†The IMBRAVE 050-defined high-risk status was single tumor >2 cm but ≤5 cm (7).

MHG = the microvascular invasion or high-grade trait; RFA = radiofrequency ablation.

---

**Supplemental Table 6. Details of adjuvant therapies.**

| Adjuvant therapy regimens                                                                                                                                                                                                                                                                                                                                                 | No. of patients |
|---------------------------------------------------------------------------------------------------------------------------------------------------------------------------------------------------------------------------------------------------------------------------------------------------------------------------------------------------------------------------|-----------------|
| <i>The resection cohort</i> (n=100)                                                                                                                                                                                                                                                                                                                                       |                 |
| transarterial chemoembolization (once, performed within 3 months after surgery)                                                                                                                                                                                                                                                                                           | 55 (55.0)       |
| transarterial chemoembolization (once, performed within 3 months after surgery) + apatinib (750 mg, oral, once a day; started within 3 months after surgery and treated until recurrence or dose-limiting toxicity)                                                                                                                                                       | 1 (1.0)         |
| transarterial chemoembolization (once, performed within 3 months after surgery) + sorafenib (oral; 200 mg, twice a day; or 200 mg, once a day; or 400 mg, twice a day; started within 3 months after surgery and treated until recurrence or dose-limiting toxicity)                                                                                                      | 11 (11.0)       |
| transarterial chemoembolization (once, performed within 3 months after surgery) + pembrolizumab (200 mg, intravenous; every three weeks; started within 3 months after surgery and treated until recurrence or dose-limiting toxicity)                                                                                                                                    | 2 (2.0)         |
| transarterial chemoembolization (once, performed within 3 months after surgery) + camrelizumab (200 mg, intravenous; every three weeks; started within 3 months after surgery and treated until recurrence or dose-limiting toxicity) + lenvatinib (8 mg, oral, once a day; started within 3 months after surgery and treated until recurrence or dose-limiting toxicity) | 3 (3.0)         |
| radiation therapy (for the marginal parenchyma and the tumor bed; once, performed within 3 months after surgery)                                                                                                                                                                                                                                                          | 1 (1.0)         |
| sorafenib (oral; 200 mg, twice a day; or 200 mg, once a day; or 400 mg, twice a day; started within 3 months after surgery and treated until recurrence or dose-limiting toxicity)                                                                                                                                                                                        | 12 (12.0)       |
| lenvatinib (8 mg, oral, once a day; started within 3 months after surgery and treated until recurrence or dose-limiting toxicity)                                                                                                                                                                                                                                         | 6 (6.0)         |
| atezolizumab (1200 mg, intravenous) + bevacizumab (15 mg/kg, intravenous) (started within 3 months after surgery and treated for 12 months, or recurrence, or dose-limiting toxicity, whichever occurred first)                                                                                                                                                           | 3 (3.0)         |
| pembrolizumab (200 mg, intravenous; every three weeks; started within 3 months after surgery and treated until recurrence or dose-limiting toxicity)                                                                                                                                                                                                                      | 3 (3.0)         |

|                                                                                                                                                                                                                 |           |
|-----------------------------------------------------------------------------------------------------------------------------------------------------------------------------------------------------------------|-----------|
| toripolimab (240 mg, intravenous; started within 3 months after surgery and treated for 12 months, or until recurrence or dose-limiting toxicity)                                                               | 2 (2.0)   |
| tegafur,gimeracil and oteracil porassium (20 mg, oral, once a day; started within 3 months after surgery and treated until 6 months)                                                                            | 1 (1.0)   |
| <b><i>The RFA cohort (n=17)</i></b>                                                                                                                                                                             |           |
| transarterial chemoembolization (once, performed within 3 months after RFA)                                                                                                                                     | 10 (58.8) |
| Y90 radioembolization (for the RFA area and peripheral parenchyma; once, performed within 3 months after surgery)                                                                                               | 1 (5.9)   |
| sorafenib (oral; 200 mg, twice a day; or 200 mg, once a day; or 400 mg, twice a day; started within 3 months after surgery and treated until recurrence or dose-limiting toxicity)                              | 2 (11.8)  |
| lenvatinib (8 mg, oral, once a day; started within 3 months after surgery and treated until recurrence or dose-limiting toxicity)                                                                               | 3 (17.6)  |
| atezolizumab (1200 mg, intravenous) + bevacizumab (15 mg/kg, intravenous) (started within 3 months after surgery and treated for 12 months, or recurrence, or dose-limiting toxicity, whichever occurred first) | 1 (5.9)   |
| Note.—Data in parentheses are percentages. RFA = radiofrequency ablation.                                                                                                                                       |           |



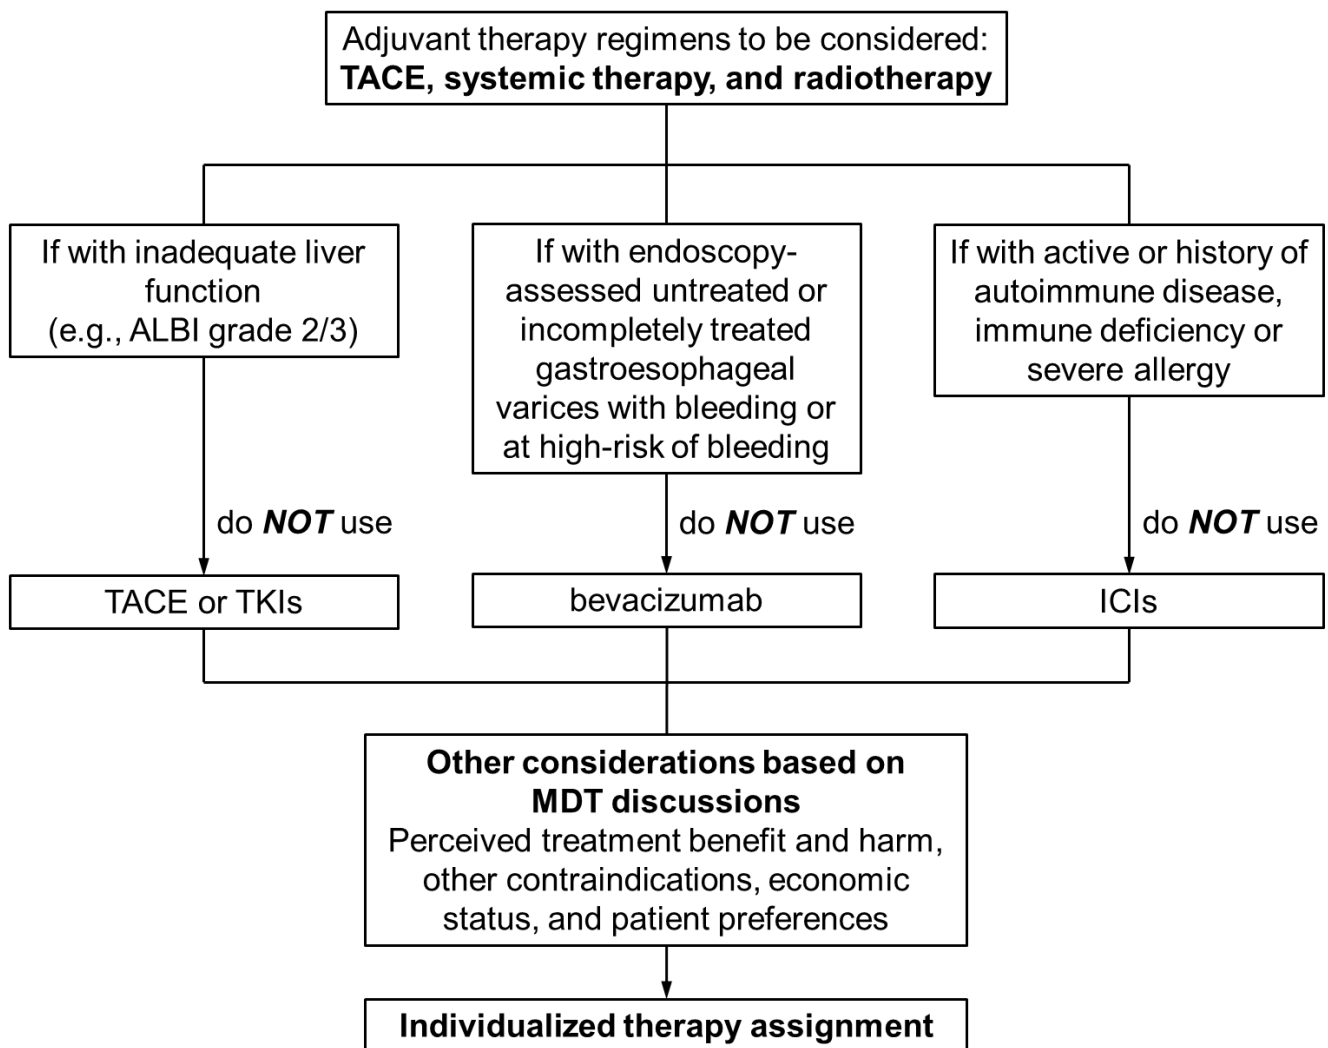

**Supplemental Figure 1.** Schematic for adjuvant therapy allocation.

Abbreviations: ICI, immune checkpoint inhibitor; MDT, multidisciplinary team; TACE, transarterial chemoembolization; TKI, tyrosine Kinase Inhibitors.

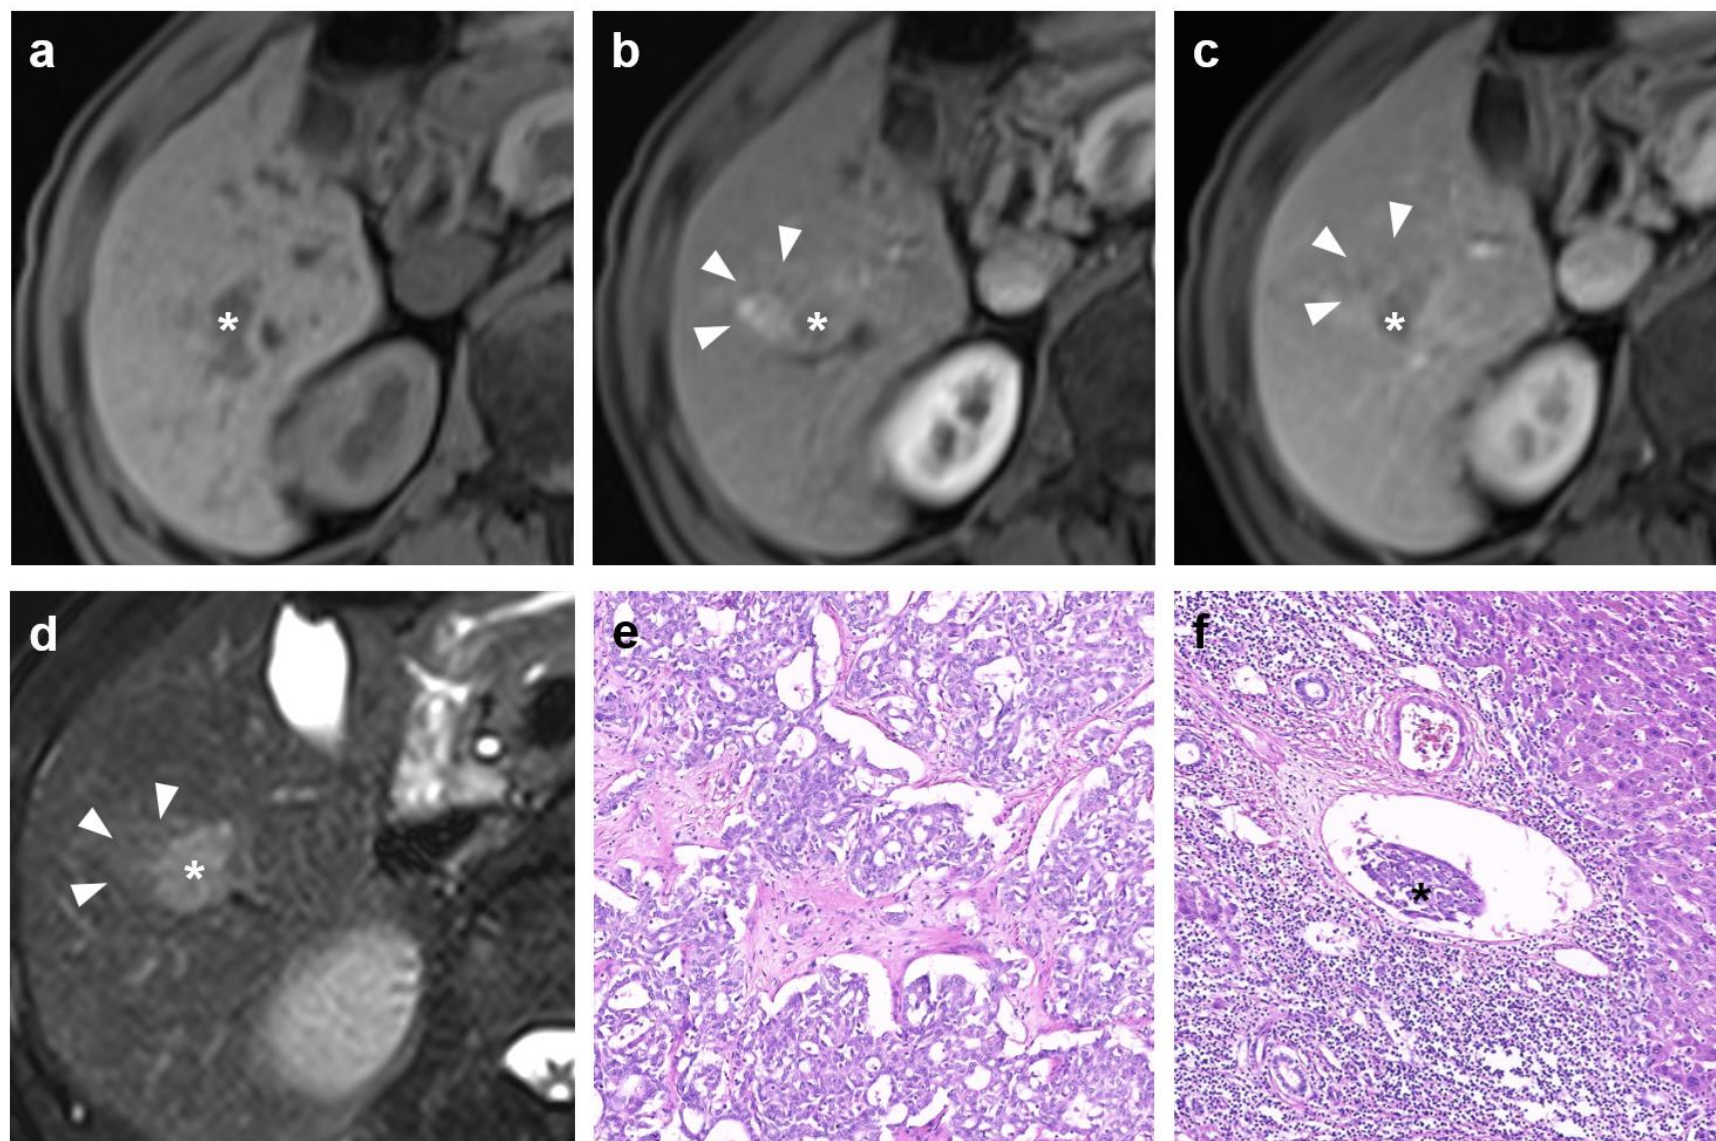

**Supplemental Figure 2.** Contrast-enhanced MR images of a 48-year-old male patient with chronic hepatitis B and a serum  $\alpha$ -fetoprotein of  $>1210$  ng/mL. A 2.7 cm hepatocellular carcinoma with non-simple nodular growth type (**white star**) was detected in segment V. The tumor shows hypointensity on T1-weighted pre-contrast images (**a**), nonrim hyperenhancement and corona enhancement (**arrowhead**) in the late arterial phase (**b**), and nonperipheral washout (**white star**) and peritumoral hypoenhancement (**arrowhead**) in the portal venous phase (**c**). The tumor (**white star**) also demonstrates mild-moderate hyperintensity on T2-weighted images (**d**) with peritumoral mild-to-moderate hyperintensity (**arrowhead**). Considering the presence of corona enhancement, portal venous phase peritumoral hypoenhancement, and peritumoral mild-moderate T2 hyperintensity, the VICT2 trait is present. This patient is thus assigned an MHG-positive status according to the MHG trait. The tumor was histopathologically confirmed as an Edmondson-Steiner G3 tumor (**e**; hematoxylin-eosin stain; magnification,  $\times 100$ ) with microvascular invasion (**black star**, **f**; with hematoxylin-eosin stain; magnification,  $\times 100$ ). The patient experienced recurrence 121 days after curative resection.

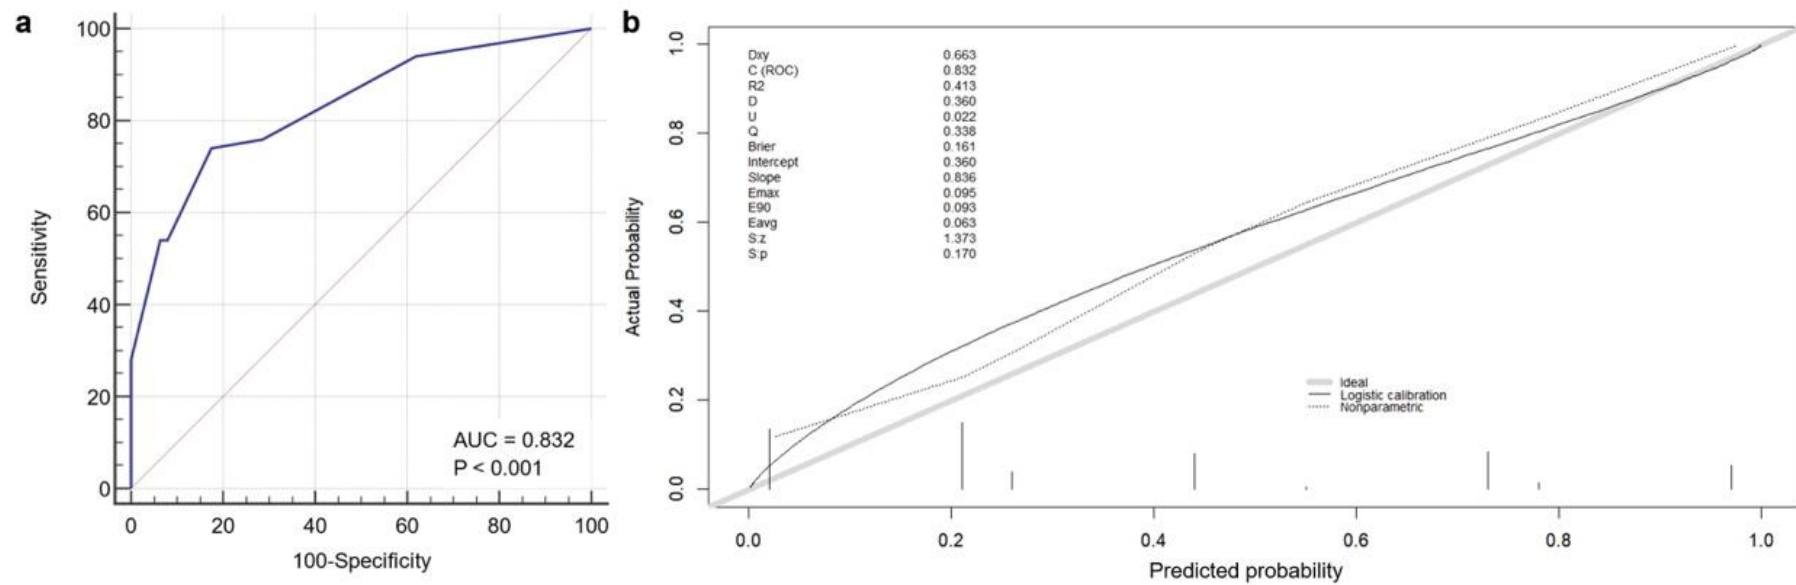

**Supplemental Figure 3.** Testing dataset receiver operating characteristic curve (**a**) and calibration curve (**b**) of the MVI or high-grade (MHG) score based on majority interpretations.
